# Supplementary material for: Hexokinase 2 controls cellular stress response through localization of an RNA-binding protein
Source: PubMed Central journal article supplement (PMC4558502; doi:10.1038/cddis.2015.209), 2015-08-06

**Supplemental Figure S1. Hexokinase 2 is required for cytoplasmic accumulation of hnRNP A1 during hypertonic stress.** HeLa T4+ cells were transfected with HK2-targeting (siHK2) or non-targeting control (siCTRL) siRNAs for 48 hours. Representative confocal microscopy images of hnRNP A1 localization and HK2 abundance by immunofluorescence in DMEM or sorbitol treated cells are shown. The western blot analysis of imaged cells is shown in Figure 2A.

**Supplemental Figure S2. Ectopic Overexpression of Hexokinase 2 has no appreciable effect on hnRNP A1 abundance and localization.** HeLa T4+ cells were transiently transfected with HK2-expressing (FLAG-HK2) or control (EV) plasmid for 48 hours and subsequently analysed for the abundance (by western blotting, **(A)**) or subcellular localization (by immunofluorescence, **(B)**) of hnRNP A1.

**Supplemental Figure S3. Coxsackievirus type B3 (CVB3)-induced cytoplasmic accumulation of hnRNP A1 is independent of hexokinase 2.** HeLa cells were transfected with HK2-targeting (siHK2) or non-targeting control (siCTRL) siRNAs followed by sham (control) or CVB3 infection for 3 or 6 hours as indicated. **(A)** Expression of hnRNPA1 (left panel) and CVB3 capsid protein VP1 (right panel) was visualized by immunofluorescence. **(B)** Protein levels of HK2, hnRNP A1, VP1, and  $\beta$ -actin (loading control) were examined by western blot analysis. MW marker is indicated on the left.

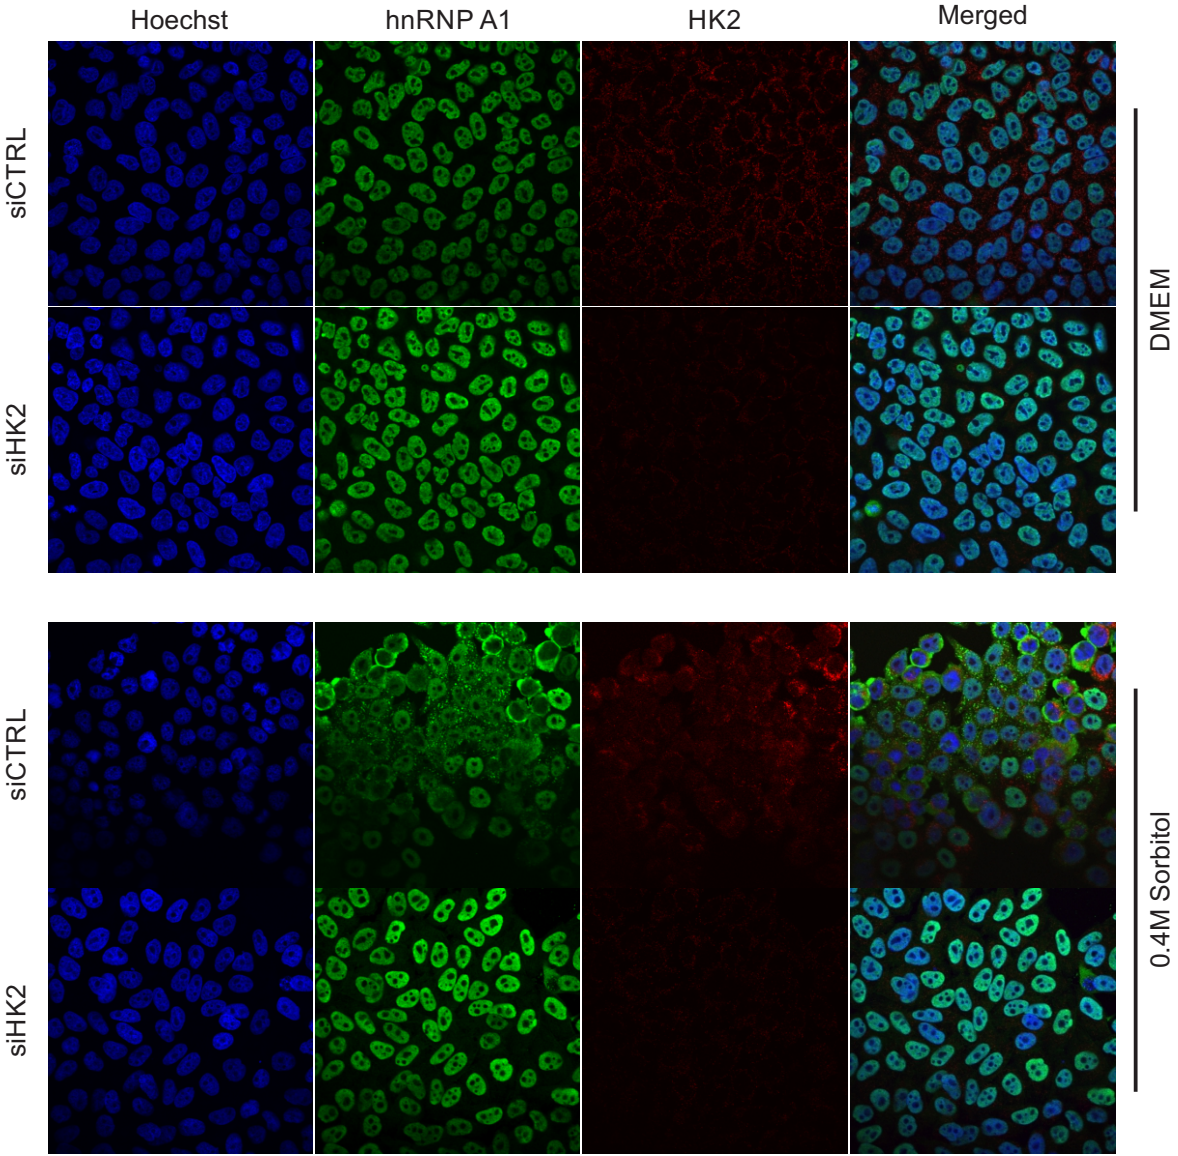

**A.**

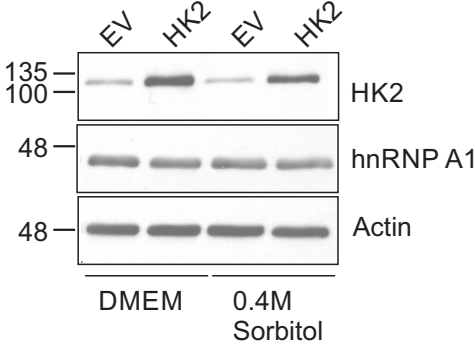

**B.**

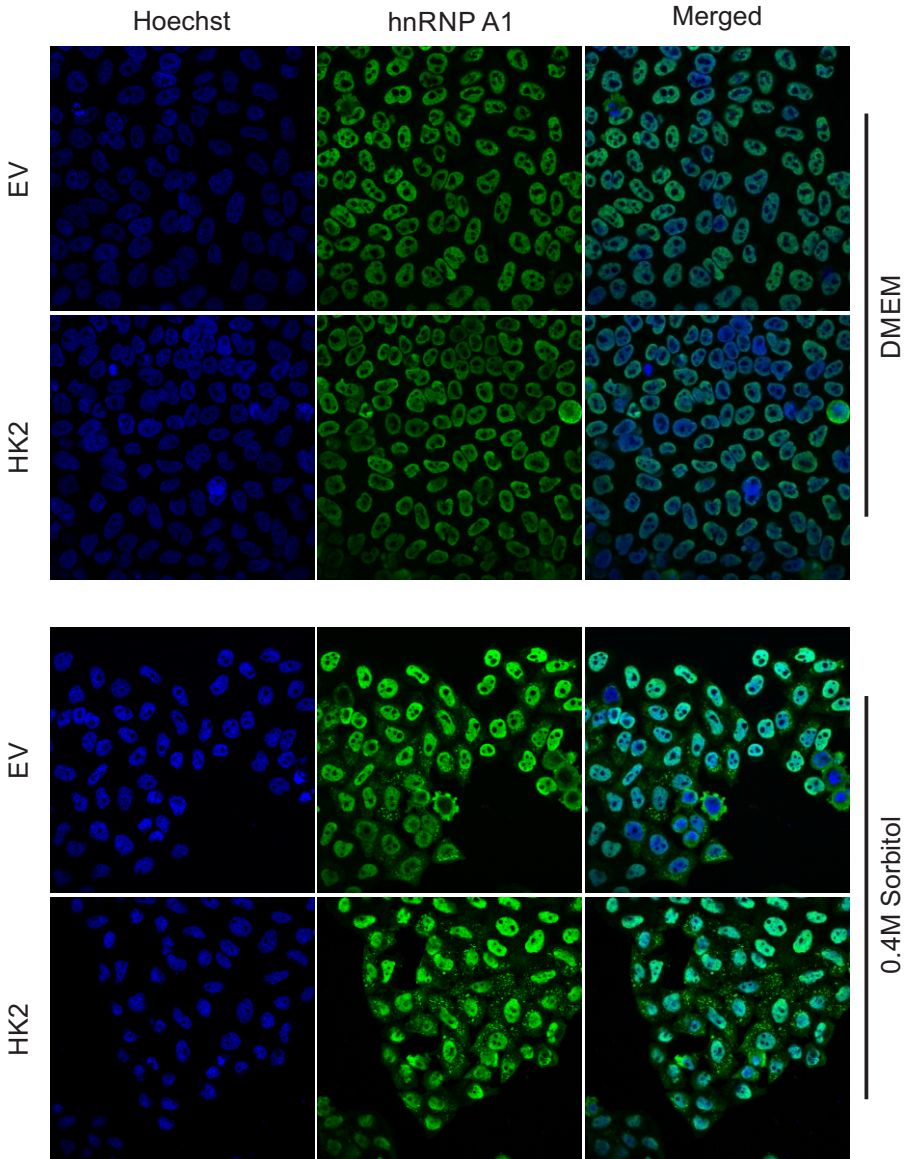

**A.**

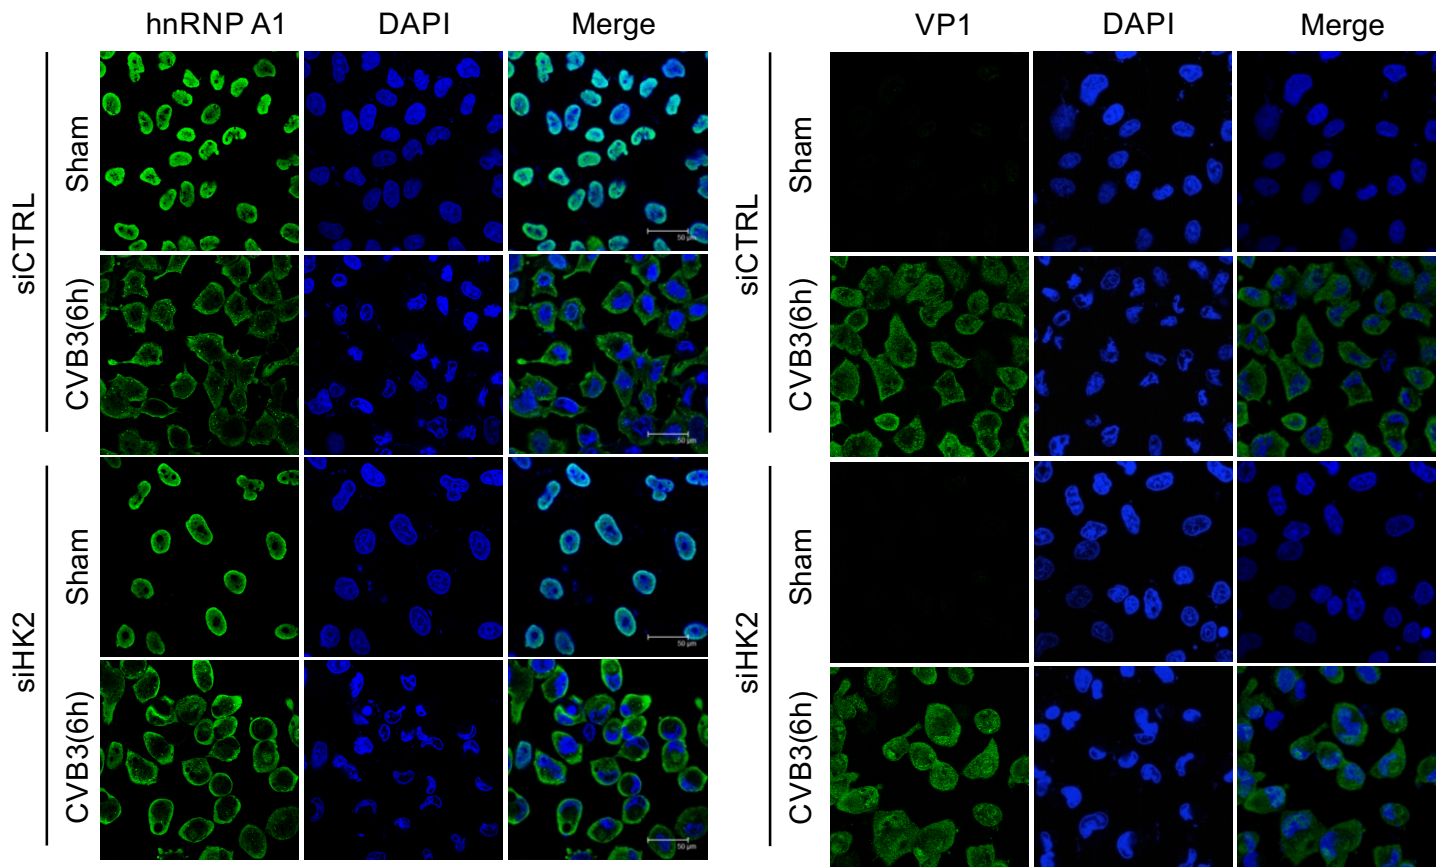

**B.**

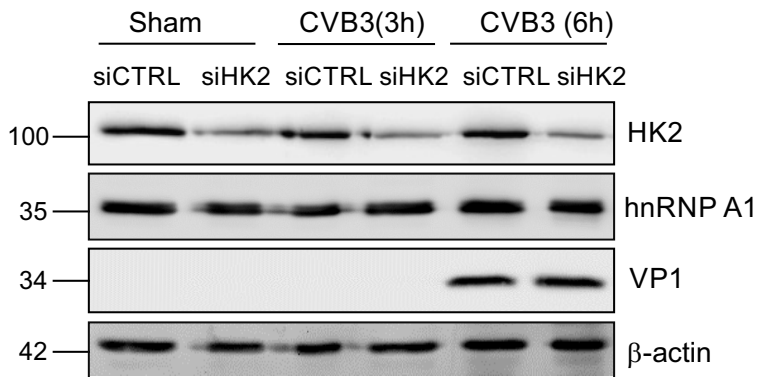

Supplement: cddis2015209x1.pdf [file cddis2015209x1.pdf]
